# Supplementary material for: Quantitative assessment of background parenchymal enhancement is associated with lifetime breast cancer risk in screening MRI
Source: Springer Nature journal article supplement (doi:10.1007/s00330-024-10758-9), 2024-04-29
Supplement: MOESM1 [file 27034434]

**Quantitative assessment of background parenchymal enhancement is associated with lifetime breast cancer risk in screening MRI**

**Electronic Supplementary Material (ESM)**

**Supplementary Material S1. MRI Imaging Parameters**

|                      | T1-NFS          | DCE-MRI         |
|----------------------|-----------------|-----------------|
| matrix               | 448 × 448 x 176 | 448 × 448 x 176 |
| field of view (FOV)  | 380 mm x 380 mm | 380 mm x 380 mm |
| slice thickness      | 1.1 mm          | 1.1 mm          |
| flip angle           | 20°             | 10°             |
| repetition time (TR) | 6.62 msec       | 4.14 msec       |
| echo time (TE)       | 2.91 msec       | 1.54 msec       |

## Supplementary Material S2. Four Quantitative BPE Calculations

The percent enhancement (PE) at each voxel,  $\vec{r}$ , representing wash-in enhancement characteristics was measured as follows:

$$PE(\vec{r})(\%) = \left( \frac{I_{\text{early}}(\vec{r}) - I_{\text{pre}}(\vec{r})}{I_{\text{pre}}(\vec{r})} \right) \times 100 \quad (1)$$

where  $I_{\text{pre}}$  is pre-contrast image intensity, and  $I_{\text{early}}$  is 120-second early-phase post-contrast image intensity.

The signal enhancement ratio (SER) at each voxel representing delayed enhancement characteristics was measured as follows:

$$SER(\vec{r})(\%) = \left( \frac{I_{\text{early}}(\vec{r}) - I_{\text{pre}}(\vec{r})}{I_{\text{delayed}}(\vec{r}) - I_{\text{pre}}(\vec{r})} \right) \times 100 \quad (2)$$

where  $I_{\text{pre}}$  is pre-contrast image intensity, and  $I_{\text{early}}$  is 120-second early-phase post-contrast image intensity, and  $I_{\text{delayed}}$  is 390-second delayed-phase post-contrast image intensity.

The segmented masks of the whole breast and FGT are denoted as  $M_{\text{Breast}}$  and  $M_{\text{FGT}}$ . We identified voxels within the FGT region with enhancement ratios at or above a predetermined enhancement ratio threshold. The total volume (in  $\text{cm}^3$ ) of these voxels, denoted as  $V_{\text{PE}}$  in the PE map and  $V_{\text{SER}}$  in the SER map, was computed as follows:

$$V_{\text{PE}} = \sum_{\vec{r} \in M_{\text{FGT}}} (PE(\vec{r}) \geq PE_T) \times \text{vol} \quad (3)$$

$$V_{\text{SER}} = \sum_{\vec{r} \in M_{\text{FGT}}} (SER(\vec{r}) \geq SER_T) \times \text{vol} \quad (4)$$

where  $PE_T$  is the enhancement ratio threshold for PE at each voxel,  $SER_T$  is the enhancement ratio threshold for the SER at each voxel, and  $\text{vol}$  is voxel volume in  $\text{cm}^3$ .  $PE_T$  and  $SER_T$  were set as 30% and 90%, respectively.

Based on the segmentation masks  $M_{\text{Breast}}$  and  $M_{\text{FGT}}$ , the total volumes ( $\text{cm}^3$ ) of FGT and the whole breast are computed as follows:

$$V_{\text{FGT}} = \sum_{\vec{r} \in M_{\text{FGT}}} (\vec{r}) \times \text{vol} \quad (5)$$

$$V_{\text{Breast}} = \sum_{\vec{r} \in M_{\text{Breast}}} (\vec{r}) \times \text{vol} \quad (6)$$

Finally, we estimated BPE over the FGT volume (FGT-wise BPE) and the whole breast volume (breast-wise BPE) to generate four percentage-based BPE measures as follows:

$$PE_{\text{FGT}}(\%) = \frac{V_{\text{PE}}}{V_{\text{FGT}}} \times 100 \quad (7)$$

$$PE_{\text{Breast}}(\%) = \frac{V_{\text{PE}}}{V_{\text{Breast}}} \times 100 \quad (8)$$

$$SER_{\text{FGT}}(\%) = \frac{V_{\text{SER}}}{V_{\text{FGT}}} \times 100 \quad (9)$$

$$SER_{\text{Breast}}(\%) = \frac{V_{\text{SER}}}{V_{\text{Breast}}} \times 100 \quad (10)$$

**Supplementary Material S3.** Quantitative BPE comparison in premenopausal and postmenopausal women using Mann–Whitney U-test

|                                          | High-risk non- <i>BRCA</i> | Non-high-risk | Adjusted <i>p</i> | High-risk non- <i>BRCA</i> | <i>BRCA</i> | Adjusted <i>p</i> |
|------------------------------------------|----------------------------|---------------|-------------------|----------------------------|-------------|-------------------|
| <b>Premenopausal women</b>               | N = 198                    | N = 19        |                   | N = 198                    | N = 91      |                   |
| PE <sub>FGT</sub> (%) (Median (IQR))     | 12.5 (17.7)                | 10.4 (9.9)    | 1.0               | 12.5 (17.7)                | 9.5 (12.5)  | .298              |
| PE <sub>Breast</sub> (%) (Median (IQR))  | 2.6 (5.0)                  | 1.0 (2.0)     | .192              | 2.6 (5.0)                  | 2.1 (3.2)   | .838              |
| SER <sub>FGT</sub> (%) (Median (IQR))    | 6.7 (5.8)                  | 5.5 (5.2)     | 1.0               | 6.7 (5.8)                  | 8.1 (8.1)   | .426              |
| SER <sub>Breast</sub> (%) (Median (IQR)) | 1.4 (2.2)                  | 1.0 (1.3)     | .678              | 1.4 (2.2)                  | 1.7 (2.7)   | 1.0               |
| IER (%) (Median (IQR))                   | 43.8 (58.4)                | 31.7 (38.7)   | 1.0               | 43.8 (58.4)                | 35.1 (33.8) | .294              |
| DER (%) (Median (IQR))                   | 111.6 (111.9)              | 86.4 (52.0)   | 1.0               | 111.6 (111.9)              | 90.0 (71.5) | .271              |
| <b>Postmenopausal women</b>              | N = 101                    | N = 52        |                   | N = 101                    | N = 74      |                   |
| PE <sub>FGT</sub> (%) (Median (IQR))     | 7.1 (11.0)                 | 7.3 (8.0)     | 1.0               | 7.1 (11.0)                 | 5.9 (7.9)   | 1.0               |
| PE <sub>Breast</sub> (%) (Median (IQR))  | 0.7 (1.4)                  | 0.6 (0.8)     | 1.0               | 0.7 (1.4)                  | 0.5 (0.7)   | .156              |
| SER <sub>FGT</sub> (%) (Median (IQR))    | 9.2 (6.9)                  | 11.1 (6.1)    | .114              | 9.2 (6.9)                  | 10.1 (6.4)  | 1.0               |
| SER <sub>Breast</sub> (%) (Median (IQR)) | 0.9 (1.6)                  | 1.1 (1.6)     | 1.0               | 0.9 (1.6)                  | 0.7 (0.9)   | 1.0               |
| IER (%) (Median (IQR))                   | 26.8 (28.5)                | 25.4 (23.0)   | 1.0               | 26.8 (28.5)                | 22.6 (21.4) | 1.0               |
| DER (%) (Median (IQR))                   | 61.7 (57.4)                | 58.1 (41.6)   | 1.0               | 61.7 (57.4)                | 54.3 (45.7) | 1.0               |

BPE, background parenchymal enhancement; PE, percent enhancement; SER, signal enhancement ratio; IER, initial enhancement ratio; DER, delayed enhancement ratio; FGT, fibroglandular tissue; IQR, interquartile range.

\* Significant different with adjusted *p* value < .10

**Supplementary Material S4.** Univariate linear regression analysis for Quantitative BPE increases.

|                    | PE <sub>FGT</sub>       |                | PE <sub>Breast</sub>    |                | SER <sub>FGT</sub>      |                |
|--------------------|-------------------------|----------------|-------------------------|----------------|-------------------------|----------------|
|                    | Coefficient (CI)        | <i>p</i> value | Coefficient (CI)        | <i>p</i> value | Coefficient (CI)        | <i>p</i> value |
| Age                | -0.173 [-0.237, -0.108] | <0.001*        | -0.222 [-0.275, -0.169] | <0.001*        | 0.089 [0.03, 0.147]     | 0.003*         |
| BMI                | -0.027 [-0.105, 0.051]  | 0.495          | -0.232 [-0.296, -0.169] | <0.001*        | -0.118 [-0.187, -0.049] | <0.001*        |
| Menopausal status  | -0.07 [-0.094, -0.046]  | <0.001*        | -0.084 [-0.104, -0.064] | <0.001*        | 0.055 [0.034, 0.077]    | <0.001*        |
| Hormonal treatment | 0.034 [0.007, 0.061]    | 0.013*         | 0.023 [-0.0, 0.046]     | 0.052          | 0.001 [-0.023, 0.025]   | 0.948          |
| FGT level          | 0.042 [-0.0, 0.085]     | 0.051          | 0.172 [0.139, 0.206]    | <0.001*        | 0.027 [-0.011, 0.065]   | 0.168          |
| BRCA gene mutation | -0.029 [-0.055, -0.003] | 0.029*         | -0.016 [-0.038, 0.007]  | 0.167          | 0.026 [0.002, 0.049]    | 0.030*         |

  

|                    | SER <sub>Breast</sub>   |                | IER                     |                | DER                     |                |
|--------------------|-------------------------|----------------|-------------------------|----------------|-------------------------|----------------|
|                    | Coefficient (CI)        | <i>p</i> value | Coefficient (CI)        | <i>p</i> value | Coefficient (CI)        | <i>p</i> value |
| Age                | -0.215 [-0.279, -0.151] | <0.001*        | -0.078 [-0.117, -0.039] | <0.001*        | -0.159 [-0.212, -0.106] | <0.001*        |
| BMI                | -0.393 [-0.464, -0.322] | <0.001*        | -0.044 [-0.09, 0.003]   | 0.067          | -0.047 [-0.112, 0.017]  | 0.148          |
| Menopausal status  | -0.052 [-0.076, -0.028] | <0.001*        | -0.038 [-0.052, -0.023] | <0.001*        | -0.073 [-0.092, -0.053] | <0.001*        |
| Hormonal treatment | 0.031 [0.004, 0.058]    | 0.025*         | 0.013 [-0.004, 0.029]   | 0.126          | 0.025 [0.003, 0.047]    | 0.028*         |
| FGT level          | 0.277 [0.241, 0.313]    | <0.001*        | 0.047 [0.021, 0.072]    | <0.001*        | 0.079 [0.044, 0.114]    | <0.001*        |
| BRCA gene mutation | 0.011 [-0.015, 0.038]   | 0.405          | -0.01 [-0.026, 0.006]   | 0.223          | -0.016 [-0.038, 0.005]  | 0.139          |

**Supplementary Material S5.** Multivariate linear regression analysis for Quantitative BPE increases.

|                    | PE <sub>FGT</sub>       |         | PE <sub>Breast</sub>    |         | SER <sub>FGT</sub>      |         |
|--------------------|-------------------------|---------|-------------------------|---------|-------------------------|---------|
|                    | Coefficient (CI)        | p value | Coefficient (CI)        | p value | Coefficient (CI)        | p value |
| Age                | -0.094 [-0.196, 0.008]  | 0.071   | -0.101 [-0.181, -0.021] | 0.014*  | -0.004 [-0.095, 0.087]  | 0.924   |
| BMI                | 0.009 [-0.081, 0.099]   | 0.842   | -0.111 [-0.181, -0.041] | 0.002*  | -0.124 [-0.204, -0.044] | 0.002*  |
| Menopausal status  | -0.044 [-0.08, -0.008]  | 0.018*  | -0.033 [-0.061, -0.005] | 0.022*  | 0.067 [0.035, 0.099]    | <0.001* |
| Hormonal treatment | 0.023 [-0.005, 0.05]    | 0.102   | -0.002 [-0.023, 0.019]  | 0.860   | 0.0 [-0.024, 0.024]     | 0.995   |
| FGT level          | -0.012 [-0.065, 0.041]  | 0.654   | 0.095 [0.054, 0.136]    | <0.001* | 0.033 [-0.014, 0.08]    | 0.165   |
| BRCA gene mutation | -0.036 [-0.062, -0.009] | 0.008*  | -0.012 [-0.033, 0.009]  | 0.255   | 0.029 [0.006, 0.053]    | 0.015*  |

  

|                    | SER <sub>Breast</sub>   |         | IER                    |         | DER                     |         |
|--------------------|-------------------------|---------|------------------------|---------|-------------------------|---------|
|                    | Coefficient (CI)        | p value | Coefficient (CI)       | p value | Coefficient (CI)        | p value |
| Age                | -0.157 [-0.243, -0.07]  | <0.001* | -0.001 [-0.063, 0.061] | 0.979   | -0.019 [-0.103, 0.065]  | 0.656   |
| BMI                | -0.197 [-0.273, -0.121] | <0.001* | -0.0 [-0.055, 0.054]   | 0.990   | 0.033 [-0.041, 0.106]   | 0.380   |
| Menopausal status  | 0.039 [0.009, 0.07]     | 0.012*  | -0.032 [-0.054, -0.01] | 0.005*  | -0.058 [-0.088, -0.029] | <0.001* |
| Hormonal treatment | -0.004 [-0.027, 0.019]  | 0.752   | 0.007 [-0.009, 0.024]  | 0.398   | 0.015 [-0.008, 0.037]   | 0.200   |
| FGT level          | 0.209 [0.164, 0.254]    | <0.001* | 0.025 [-0.007, 0.057]  | 0.125   | 0.044 [0.001, 0.088]    | 0.044*  |
| BRCA gene mutation | 0.018 [-0.005, 0.04]    | 0.118   | -0.008 [-0.024, 0.008] | 0.339   | -0.015 [-0.037, 0.006]  | 0.166   |

BMI, body mass index; BPE, background parenchymal enhancement; PE, percent enhancement; SER, signal enhancement ratio; IER, initial enhancement ratio; DER, delayed enhancement ratio; FGT, fibroglandular tissue; CI, confidence interval.

\* Significant different with adjusted p value < .05

**Supplementary Material S6.** Patient characteristics after propensity score matching.

|                             | High-risk non- <i>BRCA</i> | Non-high-risk    | Unadjusted <i>p</i> | High-risk non- <i>BRCA</i> | <i>BRCA</i>      | Unadjusted <i>p</i> |
|-----------------------------|----------------------------|------------------|---------------------|----------------------------|------------------|---------------------|
| <b>No. of patients</b>      | 71                         | 71               |                     | 165                        | 165              |                     |
| <b>Age (median (range))</b> | 55 (31-76)                 | 56 (30-86)       | .455                | 44 (23-70)                 | 40 (21-83)       | .189                |
| <b>BMI (median (range))</b> | 25.42 (17.39-39.62)        | 24.1 (18.7-40.7) | .143                | 24.75 (17.26-48.71)        | 25.1 (17.4-44.4) | .389                |
| <b>Menopausal status</b>    |                            |                  | 1.0                 |                            |                  | .912                |
| Premenopausal               | 18 (25.4%)                 | 19 (26.8%)       |                     | 89 (53.9%)                 | 91 (55.2%)       |                     |
| Postmenopausal              | 53 (74.6%)                 | 52 (73.2%)       |                     | 76 (46.1%)                 | 74 (44.8%)       |                     |
| <b>Hormone treatment</b>    |                            |                  | 1.0                 |                            |                  | .906                |
| Yes                         | 24 (33.8%)                 | 23 (32.4%)       |                     | 51 (30.9%)                 | 53 (32.1%)       |                     |
| No                          | 47 (66.2%)                 | 48 (67.6%)       |                     | 114 (69.1%)                | 112 (67.9%)      |                     |
| <b>FGT</b>                  |                            |                  | .69                 |                            |                  | .804                |
| Almost entirely fat         | 7 (9.9%)                   | 4 (5.6%)         |                     | 7 (4.2%)                   | 10 (6.1%)        |                     |
| Scattered                   | 30 (42.3%)                 | 27 (38.0%)       |                     | 61 (37.0%)                 | 55 (33.3%)       |                     |
| Heterogeneous               | 27 (38.0%)                 | 32 (45.1%)       |                     | 57 (34.5%)                 | 61 (37.0%)       |                     |
| Extreme                     | 7 (9.9%)                   | 8 (11.3%)        |                     | 40 (24.2%)                 | 39 (23.6%)       |                     |
| <b>BPE</b>                  |                            |                  | .006*               |                            |                  | < .001*             |
| Minimal                     | 22 (31.0%)                 | 34 (47.9%)       |                     | 38 (23.0%)                 | 72 (43.6%)       |                     |
| Mild                        | 25 (35.2%)                 | 17 (23.9%)       |                     | 52 (31.5%)                 | 55 (33.3%)       |                     |
| Moderate                    | 16 (22.5%)                 | 20 (28.2%)       |                     | 53 (32.1%)                 | 33 (20.0%)       |                     |
| Marked                      | 8 (11.3%)                  | 0 (0.0%)         |                     | 22 (13.3%)                 | 5 (3.0%)         |                     |

BMI, body mass index; BPE, background parenchymal enhancement; FGT, fibroglandular tissue.

The *p* values are from Mann-Whitney U-test for age and BMI, and chi-squared test for menopausal status, hormone treatment history, FGT and BPE.

\* Significant different with unadjusted *p* value < .05
